# Supplementary material for: Antidepressant-Like Effects of Gyejibokryeong-hwan in a Mouse Model of Reserpine-Induced Depression
Source: PubMed Central journal article supplement (PMC6038693; doi:10.1155/2018/5845491), 2018-06-26
Supplement: 5845491.f1.pdf [file 5845491.f1.pdf]

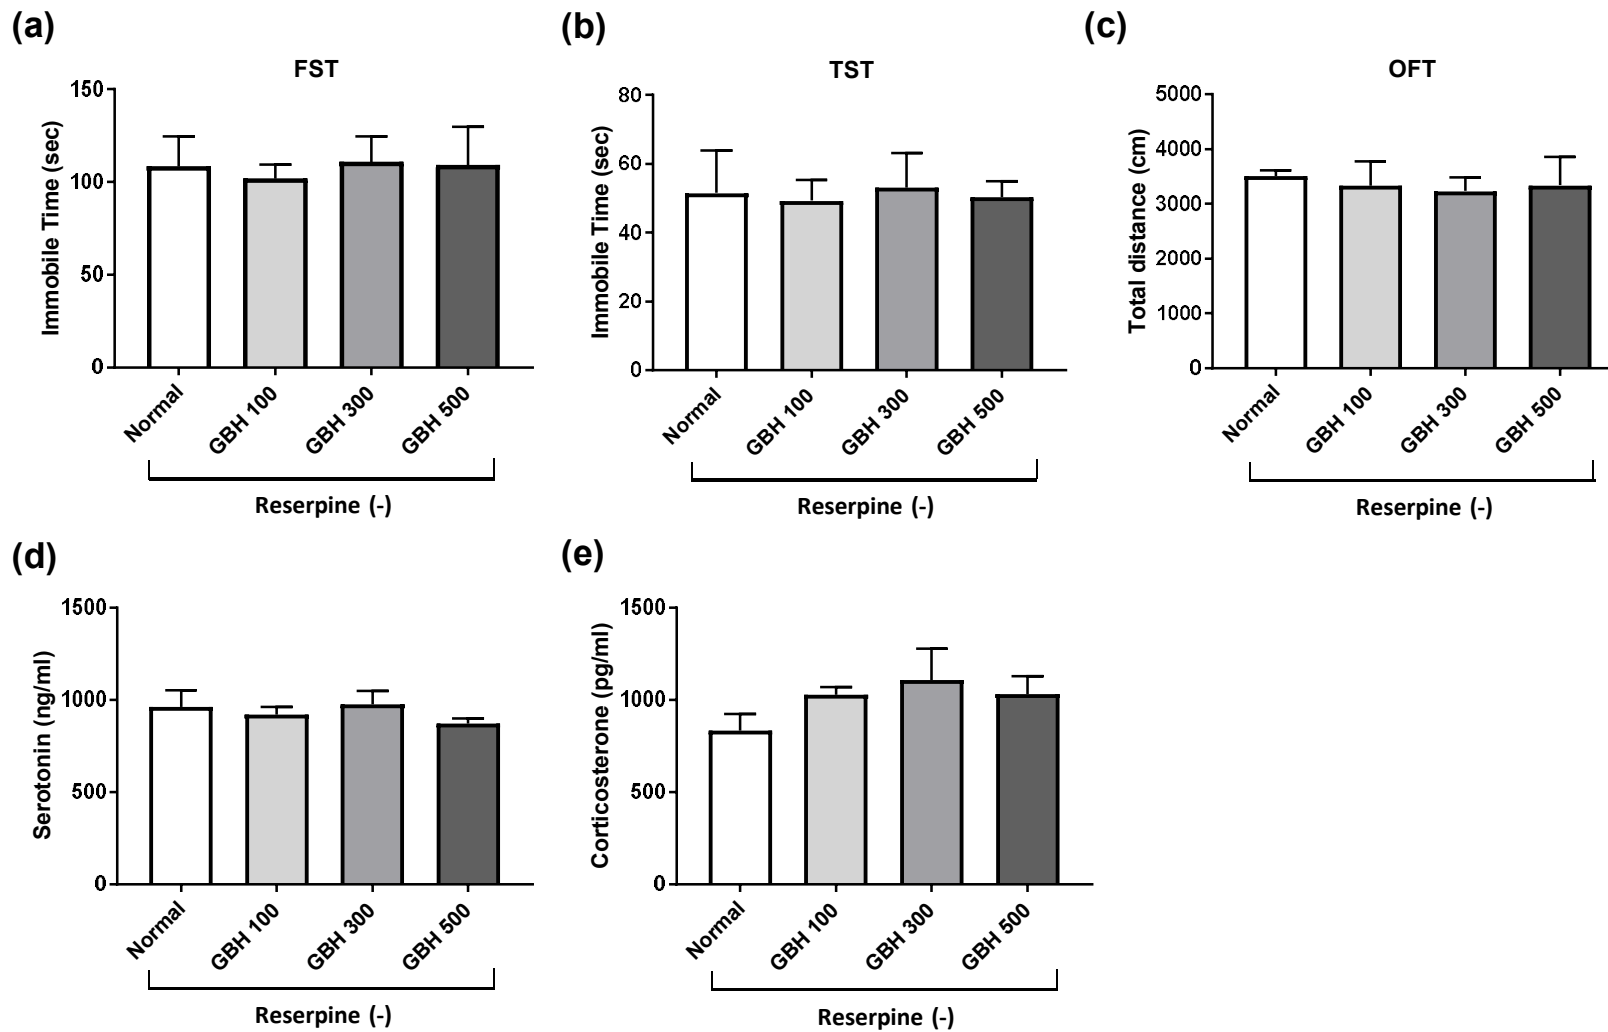

**Supplementary Material 1.** Effect of on Gyejibokryeong-hwan (GBH) depressive-like behaviors and the concentration of plasma serotonin and corticosterone in mice. (a) Immobility time in the forced swimming test (FST) and (b) tail suspension test (TST); (c) total distance travelled in the open field test (OFT). All behavioral tests were conducted on day 11. The concentration of plasma (d) serotonin and (e) corticosterone was determined by ELISA. Data represent mean  $\pm$  SD (n = 6, one-way ANOVA).
